# Supplementary material for: Serine protease Bm-SP142 was differentially expressed in resistant and susceptible Bombyx mori strains, involving in the defence response to viral infection
Source: PubMed Central journal article supplement (PMC5393580; doi:10.1371/journal.pone.0175518), 2017-04-17

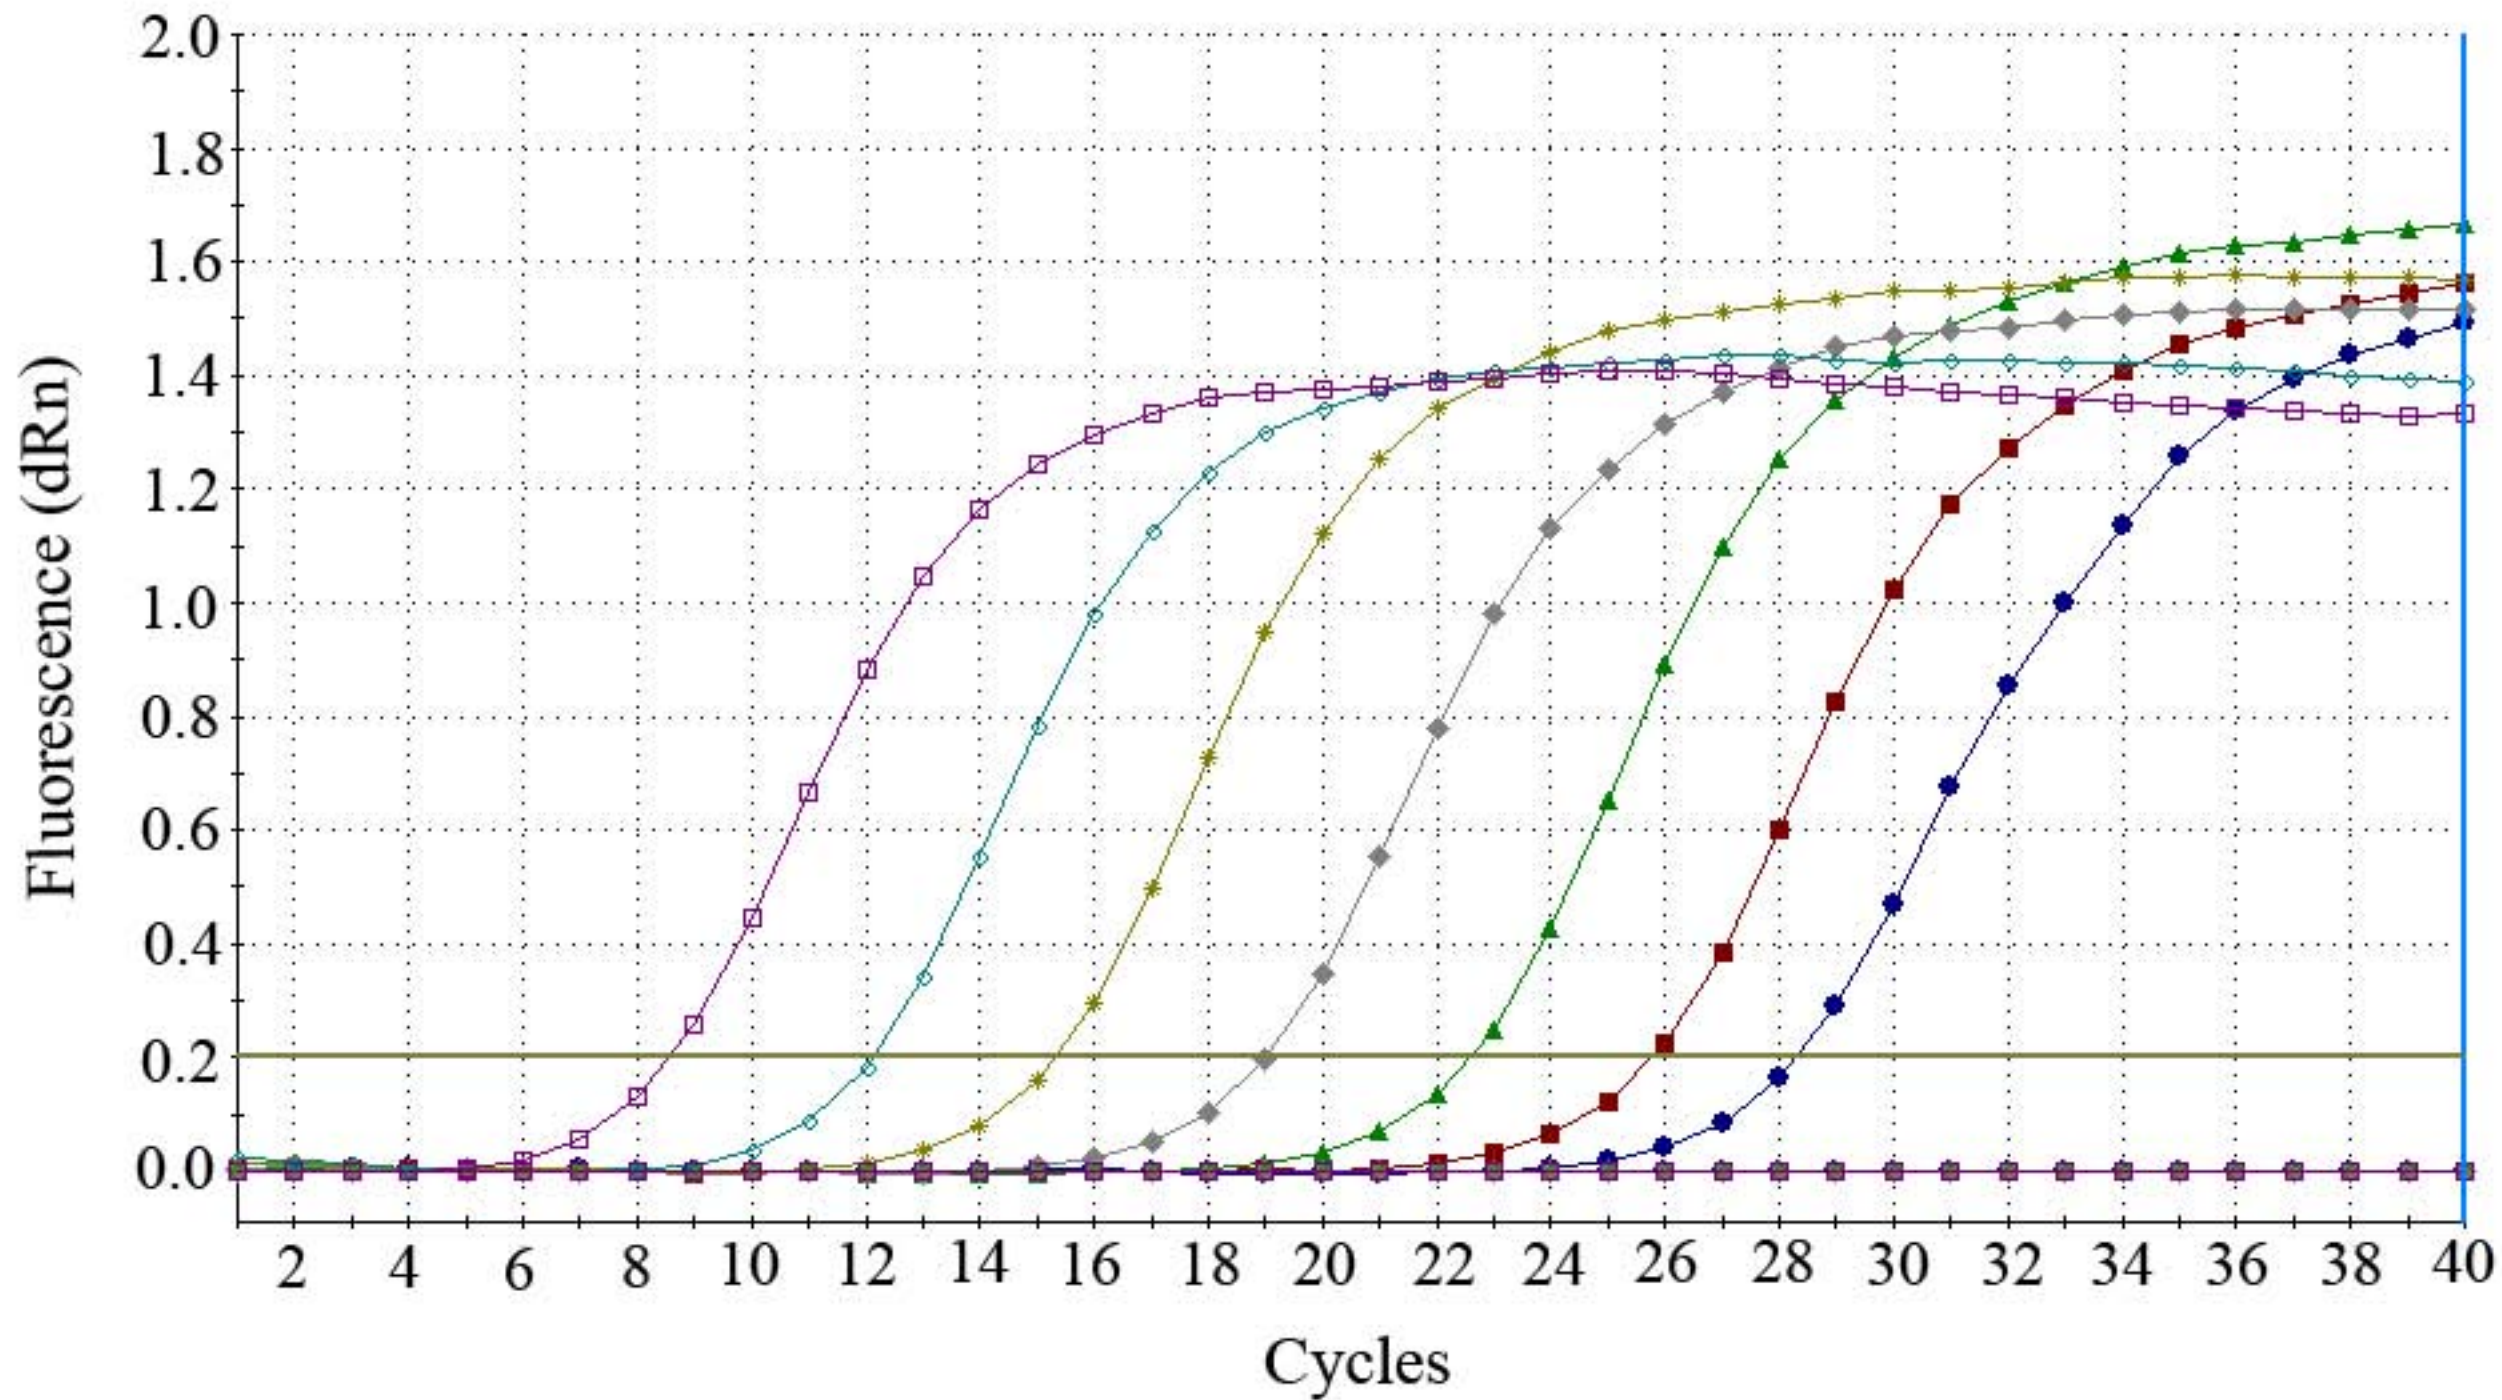

Supplement: pone.0175518.s001.pdf [file pone.0175518.s001.pdf]
